# Supplementary material for: Recovering from Financial Implications of Flood Impacts—The Role of Risk Transfer in the West African Context
Source: MDPI journal article supplement (doi:10.3390/su14148433), 2022-07-10
Supplement: s1 [file s1]

Supplementary file S1

**Descriptive statistics for the main input variables of the GLM**

Components of *Financial recovery time of a household (all impact types, dependent variable)*

Financial recovery time of a household from agricultural impacts (on average over the past 20 years)

---

|   |                         | Freq. | Percent | Cum.   |
|---|-------------------------|-------|---------|--------|
| 0 | No agricultural impacts | 32    | 4.30    | 4.30   |
| 1 | Up to 5 months          | 207   | 27.82   | 32.12  |
| 2 | 6 months - 11 months    | 276   | 37.10   | 69.22  |
| 3 | 1 - 2 years             | 86    | 11.56   | 80.78  |
| 4 | > 2 years               | 5     | 0.67    | 81.45  |
| 5 | Usually no recovery     | 138   | 18.55   | 100.00 |
|   | Total                   | 744   | 100.00  |        |

---

Financial recovery time of a household from material impacts (on average over the past 20 years)

---

|   |                     | Freq. | Percent | Cum.   |
|---|---------------------|-------|---------|--------|
| 0 | No material impacts | 246   | 33.06   | 33.06  |
| 1 | Up to 5 months      | 156   | 20.97   | 54.03  |
| 2 | 6 months-11 months  | 182   | 24.46   | 78.49  |
| 3 | 1-2 years           | 79    | 10.62   | 89.11  |
| 4 | > 2 years           | 11    | 1.48    | 90.59  |
| 5 | Usually no recovery | 70    | 9.41    | 100.00 |
|   | Total               | 744   | 100.00  |        |

---

---

Financial recovery time of a household from health impacts (on average over the past 20 years)

---

|       |                     | Freq. | Percent | Cum.   |
|-------|---------------------|-------|---------|--------|
| 0     | No health impacts   | 125   | 16.80   | 16.80  |
| 1     | Up to 5 months      | 235   | 31.59   | 48.39  |
| 2     | 6 - 11 months       | 239   | 32.12   | 80.51  |
| 3     | 1 - 2 years         | 70    | 9.41    | 89.92  |
| 4     | > 2 years           | 10    | 1.34    | 91.26  |
| 5     | Usually no recovery | 65    | 8.74    | 100.00 |
| Total |                     | 744   | 100.00  |        |

---

---

Financial recovery time of a household from trade impacts (on average over the past 20 years)

---

|       |                     | Freq. | Percent | Cum.   |
|-------|---------------------|-------|---------|--------|
| 0     | No trade impacts    | 201   | 27.02   | 27.02  |
| 1     | Up to 5 months      | 205   | 27.55   | 54.57  |
| 2     | 6 - 11 months       | 182   | 24.46   | 79.03  |
| 3     | 1 - 2 years         | 74    | 9.95    | 88.98  |
| 4     | > 2 years           | 9     | 1.21    | 90.19  |
| 5     | Usually no recovery | 73    | 9.81    | 100.00 |
| Total |                     | 744   | 100.00  |        |

---

Components of *Frequency of reoccurrence (all impact types as PCA score)*

---

Frequency of agricultural impacts (on average over the last 20 years)

---

|                           | Freq. | Percent | Cum.   |
|---------------------------|-------|---------|--------|
| 0 No agricultural impacts | 32    | 4.30    | 4.30   |
| 1 More than 10 years      | 1     | 0.13    | 4.44   |
| 2 Every 5 to 10 years     | 26    | 3.49    | 7.93   |
| 3 Every 2 to 4 years      | 114   | 15.32   | 23.25  |
| 4 Once a year             | 419   | 56.32   | 79.57  |
| 5 Several times a year    | 152   | 20.43   | 100.00 |
| Total                     | 744   | 100.00  |        |

---

---

Frequency of material impacts (on average over the last 20 years)

---

|                        | Freq. | Percent | Cum.   |
|------------------------|-------|---------|--------|
| 0 No material impacts  | 246   | 33.06   | 33.06  |
| 1 More than 10 years   | 6     | 0.81    | 33.87  |
| 2 Every 5 to 10 years  | 29    | 3.90    | 37.77  |
| 3 Every 2 to 4 years   | 90    | 12.10   | 49.87  |
| 4 Once a year          | 326   | 43.82   | 93.68  |
| 5 Several times a year | 47    | 6.32    | 100.00 |
| Total                  | 744   | 100.00  |        |

---

---

Frequency of health impacts (on average over the last 20 years)

---

|                        | Freq. | Percent | Cum.   |
|------------------------|-------|---------|--------|
| 0 No health impacts    | 125   | 16.80   | 16.80  |
| 1 More than 10 years   | 2     | 0.27    | 17.07  |
| 2 Every 5 to 10 years  | 23    | 3.09    | 20.16  |
| 3 Every 2 to 4 years   | 112   | 15.05   | 35.22  |
| 4 Once a year          | 397   | 53.36   | 88.58  |
| 5 Several times a year | 85    | 11.42   | 100.00 |
| Total                  | 744   | 100.00  |        |

---

---

Frequency of trade impacts (on average over the last 20 years)

---

|                        | Freq. | Percent | Cum.   |
|------------------------|-------|---------|--------|
| 0 No trade impacts     | 201   | 27.02   | 27.02  |
| 1 More than 10 years   | 2     | 0.27    | 27.28  |
| 2 Every 5 to 10 years  | 11    | 1.48    | 28.76  |
| 3 Every 2 to 4 years   | 109   | 14.65   | 43.41  |
| 4 Once a year          | 353   | 47.45   | 90.86  |
| 5 Several times a year | 68    | 9.14    | 100.00 |
| Total                  | 744   | 100.00  |        |

---

Components of Severity of reoccurrence (all impact types as PCA score)

---

Severity of agricultural impacts (on average over the last 20 years)

---

|                           | Freq. | Percent | Cum.   |
|---------------------------|-------|---------|--------|
| 1 No agricultural impacts | 32    | 4.30    | 4.30   |
| 2 Weak                    | 27    | 3.63    | 7.93   |
| 3 Medium                  | 265   | 35.62   | 43.55  |
| 4 Strong                  | 420   | 56.45   | 100.00 |
| Total                     | 744   | 100.00  |        |

---

---

Severity of material impacts (on average over the last 20 years)

---

|                       | Freq. | Percent | Cum.   |
|-----------------------|-------|---------|--------|
| 1 No material impacts | 246   | 33.06   | 33.06  |
| 2 Weak                | 31    | 4.17    | 37.23  |
| 3 Medium              | 203   | 27.28   | 64.52  |
| 4 Strong              | 264   | 35.48   | 100.00 |
| Total                 | 744   | 100.00  |        |

---

---

Severity of health impacts (on average over the last 20 years)

---

|                     | Freq. | Percent | Cum.   |
|---------------------|-------|---------|--------|
| 1 No health impacts | 125   | 16.80   | 16.80  |
| 2 Weak              | 36    | 4.84    | 21.64  |
| 3 Medium            | 320   | 43.01   | 64.65  |
| 4 Strong            | 263   | 35.35   | 100.00 |
| Total               | 744   | 100.00  |        |

---

Severity of trade impacts (on average over the last 20 years)

---

|                    | Freq. | Percent | Cum.   |
|--------------------|-------|---------|--------|
| 1 No trade impacts | 201   | 27.02   | 27.02  |
| 2 Weak             | 39    | 5.24    | 32.26  |
| 3 Medium           | 285   | 38.31   | 70.56  |
| 4 Strong           | 219   | 29.44   | 100.00 |
| Total              | 744   | 100.00  |        |

---

Existing financial coping strategies

---

Cooperatives

---

|   |       | Freq. | Percent | Cum.   |
|---|-------|-------|---------|--------|
| 0 | No    | 565   | 75.94   | 75.94  |
| 1 | Yes   | 179   | 24.06   | 100.00 |
|   | Total | 744   | 100.00  |        |

---

---

NGO support

---

|   |       | Freq. | Percent | Cum.   |
|---|-------|-------|---------|--------|
| 0 | No    | 537   | 72.18   | 72.18  |
| 1 | Yes   | 207   | 27.82   | 100.00 |
|   | Total | 744   | 100.00  |        |

---

---

#### Insurance

---

|   |       | Freq. | Percent | Cum.   |
|---|-------|-------|---------|--------|
| 0 | No    | 720   | 96.77   | 96.77  |
| 1 | Yes   | 24    | 3.23    | 100.00 |
|   | Total | 744   | 100.00  |        |

---

---

#### Credits (from a bank)

---

|   |       | Freq. | Percent | Cum.   |
|---|-------|-------|---------|--------|
| 0 | No    | 722   | 97.04   | 97.04  |
| 1 | Yes   | 22    | 2.96    | 100.00 |
|   | Total | 744   | 100.00  |        |

---

---

#### Dealing with own resources

---

|   |       | Freq. | Percent | Cum.   |
|---|-------|-------|---------|--------|
| 0 | No    | 399   | 53.63   | 53.63  |
| 1 | Yes   | 345   | 46.37   | 100.00 |
|   | Total | 744   | 100.00  |        |

---

---

#### Governmental support

---

|   |     | Freq. | Percent | Cum.   |
|---|-----|-------|---------|--------|
| 0 | No  | 485   | 65.19   | 65.19  |
| 1 | Yes | 259   | 34.81   | 100.00 |

|       |     |        |        |
|-------|-----|--------|--------|
| Total | 744 | 100.00 | 100.00 |
|-------|-----|--------|--------|

---

Community solidarity funds

---

|   |       | Freq. | Percent | Cum.   |
|---|-------|-------|---------|--------|
| 0 | No    | 648   | 87.10   | 87.10  |
| 1 | Yes   | 96    | 12.90   | 100.00 |
|   | Total | 744   | 100.00  |        |

---

Credits (from savings groups)

---

|   |       | Freq. | Percent | Cum.   |
|---|-------|-------|---------|--------|
| 0 | No    | 572   | 76.88   | 76.88  |
| 1 | Yes   | 172   | 23.12   | 100.00 |
|   | Total | 744   | 100.00  |        |

---

Credits (from a private lender)

---

|   |       | Freq. | Percent | Cum.   |
|---|-------|-------|---------|--------|
| 0 | No    | 705   | 94.76   | 94.76  |
| 1 | Yes   | 39    | 5.24    | 100.00 |
|   | Total | 744   | 100.00  |        |



---

Remittances (family & friends)

---

|   |       | Freq. | Percent | Cum.   |
|---|-------|-------|---------|--------|
| 0 | No    | 646   | 86.83   | 86.83  |
| 1 | Yes   | 98    | 13.17   | 100.00 |
|   | Total | 744   | 100.00  |        |

---

---

None of mentioned options

---

|   |       | Freq. | Percent | Cum.   |
|---|-------|-------|---------|--------|
| 0 | No    | 653   | 87.77   | 87.77  |
| 1 | Yes   | 91    | 12.23   | 100.00 |
|   | Total | 744   | 100.00  |        |

---

## Supplementary file S2

### Principal component analyses

#### Financial recovery time

Components:

Financial recovery time from agricultural impacts (average last 20 years)

Financial recovery time from material impacts (average last 20 years)

Financial recovery time from health impacts (average last 20 years)

Financial recovery time from trade impacts (average last 20 years)

Principal components/correlation      Number of obs   =   744

Number of comp.   =   1

Trace      =      4

Rotation: (unrotated = principal)      Rho      =   0.5817

| Component   | Eigenvalue | Difference | Proportion | Cumulative |
|-------------|------------|------------|------------|------------|
| -----+----- |            |            |            |            |
| Comp1       | 2.32672    | 1.67018    | 0.5817     | 0.5817     |
| Comp2       | .656544    | .112475    | 0.1641     | 0.7458     |
| Comp3       | .544069    | .0714013   | 0.1360     | 0.8818     |
| Comp4       | .472667    | .          | 0.1182     | 1.0000     |

The score (component 1) explains ~58% of the total variance of all for variables.

#### Principal components (eigenvectors)

| Variable                                                   | Comp1  | Unexplained |
|------------------------------------------------------------|--------|-------------|
| -----+-----                                                |        |             |
| __5_18_9 Financial recovery time from agricultural impacts | 0.5041 | .4088       |
| __5_19_10 Financial recovery time from material impacts    | 0.4705 | .4849       |
| __5_20_9 Financial recovery time from health impacts       | 0.5294 | .3479       |
| __5_21_9 Financial recovery time from trade impacts        | 0.4942 | .4317       |

The score (component 1) is most correlated to \_\_5\_20\_9 (~53%)

### Frequency of flood impacts with financial implications

Components:

Frequency of agricultural impacts (average last 20 years)

Frequency of material impacts (average last 20 years)

Frequency of health impacts (average last 20 years)

Frequency of trade impacts (average last 20 years)

Principal components/correlation      Number of obs = 744

Number of comp. = 1

Trace = 4

Rotation: (unrotated = principal)      Rho = 0.4764

| Component   | Eigenvalue | Difference | Proportion | Cumulative |
|-------------|------------|------------|------------|------------|
| -----+----- |            |            |            |            |
| Comp1       | 1.90574    | 1.07971    | 0.4764     | 0.4764     |
| Comp2       | .826028    | .16507     | 0.2065     | 0.6829     |
| Comp3       | .660958    | .0536845   | 0.1652     | 0.8482     |
| Comp4       | .607273    | .          | 0.1518     | 1.0000     |

The score (component 1) explains ~48% of the total variance of all for variables

Principal components (eigenvectors)

| Variable                                                            | Comp1   Unexplained |       |
|---------------------------------------------------------------------|---------------------|-------|
| -----+-----+-----                                                   |                     |       |
| __5_18_2_ Frequency of agricultural impacts (average last 20 years) | 0.4394              | .6321 |
| __5_19_2_ Frequency of material impacts (average last 20 years)     | 0.5263              | .472  |
| __5_20_2_ Frequency of health impacts (average last 20 years)       | 0.5488              | .426  |
| __5_21_2_ Frequency of trade impacts (average last 20 years)        | 0.4782              | .5641 |

The score (component 1) is most correlated to \_\_5\_20\_2 (~55%)

### Severity of flood impacts with financial implications

Components:

Severity of agricultural impacts (average last 20 years)

Severity of material impacts (average last 20 years)

Severity of health impacts (average last 20 years)

Severity of trade impacts (average last 20 years)

Principal components/correlation      Number of obs   =   744

Number of comp.   =   1

Trace                =   4

Rotation: (unrotated = principal)      Rho                =   0.5303

| Component   | Eigenvalue | Difference | Proportion | Cumulative |
|-------------|------------|------------|------------|------------|
| -----+----- |            |            |            |            |
| Comp1       | 2.12103    | 1.38286    | 0.5303     | 0.5303     |
| Comp2       | .738162    | .123358    | 0.1845     | 0.7148     |
| Comp3       | .614804    | .0887981   | 0.1537     | 0.8685     |
| Comp4       | .526006    | .          | 0.1315     | 1.0000     |

The score (component 1) explains ~53% of the total variance of all for variables

### Principal components (eigenvectors)

| Variable                                                           | Comp1  | Unexplained |
|--------------------------------------------------------------------|--------|-------------|
| -----+-----+-----                                                  |        |             |
| __5_18_3_ Severity of agricultural impacts (average last 20 years) | 0.4481 | .5741       |
| __5_19_3_ Severity of material impacts (average last 20 years)     | 0.5203 | .4258       |
| __5_20_3_ Severity of health impacts (average last 20 years)       | 0.5414 | .3783       |
| __5_21_3_ Severity of trade impacts (average last 20 years)        | 0.4852 | .5008       |

The score (component 1) is most correlated to \_\_5\_20\_3 (~54%)

### Separate GLM for the relationship between the frequency of impacts and the remaining independent variables

Survey: Linear regression

|                       |                              |
|-----------------------|------------------------------|
| Number of strata = 24 | Number of obs = 724          |
| Number of PSUs = 724  | Population size = 6,920.6052 |
|                       | Design df = 700              |
|                       | F(14, 687) = 4.56            |
|                       | Prob > F = 0.0000            |
|                       | R-squared = 0.0762           |

| Linearized                            |             |           |          |                      |           |
|---------------------------------------|-------------|-----------|----------|----------------------|-----------|
| Frequency (all flood impacts types)   | Coefficient | std. err. | P> t     | [95% conf. interval] |           |
| HH Income per year                    | -.072381    | .0371164  | 0.052    | -.1452537            | .0004918  |
| Residence Country: Togo               | -.121166    | .0697034  | 0.083    | -.2580187            | .0156868  |
| Level of HH's agricultural dependency | -.0819728   | .0422101  | 0.053    | -.1648463            | .0009008  |
| Cooperatives                          | -.1978956   | .0902278  | 0.029*** | -.3750451            | -.020746  |
| NGO support                           | .3336607    | .090262   | 0.000*** | .1564441             | .5108774  |
| Insurance                             | -.4763062   | .2395679  | 0.047*** | -.946664             | -.0059484 |
| Credits (from a bank)                 | .3442748    | .160427   | 0.032*** | .029299              | .6592506  |
| Dealing with my own resources         | -.1964428   | .0686071  | 0.004*** | -.3311431            | -.0617424 |
| Governmental Support                  | .0636618    | .0873272  | 0.466    | -.1077928            | .2351165  |
| Community Solidarity Funds            | .1106408    | .1199386  | 0.357    | -.1248417            | .3461232  |
| Credits (from savings groups)         | .1577745    | .0830105  | 0.058    | -.0052049            | .3207539  |
| Credits (from a private lender)       | .230754     | .1309409  | 0.078    | -.0263299            | .4878379  |
| Remittances (from friend or family)   | -.0853923   | .0961479  | 0.375    | -.2741651            | .1033805  |
| None of mentioned options             | -.1790476   | .1281376  | 0.163    | -.4306277            | .0725325  |

\*\*\* = significance level  $p < 0.05$

## Separate GLM for the relationship between the severity of impacts and the remaining independent variables

Survey: Linear regression

Number of strata = 24                      Number of obs = 724  
Number of PSUs = 724                      Population size = 6,920.6052  
Design df = 700  
F(14, 687) = 12.77  
Prob > F = 0.0000  
R-squared = 0.1649

| Linearized                            |             |           |          |                      |
|---------------------------------------|-------------|-----------|----------|----------------------|
| Severity (all flood impacts types)    | Coefficient | std. err. | P> t     | [95% conf. interval] |
| HH income per year                    | -.1378533   | .0366696  | 0.000*** | -.2098488 -.0658578  |
| Residence Country: Togo               | -.4947154   | .0676398  | 0.000*** | -.6275166 -.3619141  |
| Level of HH's agricultural dependency | .0328742    | .0443661  | 0.459    | -.0542322 .1199807   |
| Cooperatives                          | -.2048971   | .0864626  | 0.018*** | -.3746542 -.03514    |
| NGO support                           | .3056924    | .0898062  | 0.001*** | .1293707 .4820141    |
| Insurance                             | -.4568194   | .2257194  | 0.043*** | -.8999875 -.0136513  |
| Credits (from a bank)                 | .1106194    | .1693635  | 0.514    | -.221902 .4431408    |
| Dealing with my own resources         | -.0725752   | .0700048  | 0.300    | -.2100197 .0648694   |
| Governmental Support                  | .1532526    | .0839662  | 0.068    | -.0116031 .3181083   |
| Community Solidarity Funds            | .3876253    | .1221494  | 0.002*** | .1478023 .6274483    |
| Credits (from savings groups)         | .2167814    | .0820887  | 0.008*** | .0556118 .377951     |
| Credits (from a private lender)       | .2754012    | .1513024  | 0.069    | -.0216596 .572462    |
| Remittances (from friend or family)   | .017503     | .1042907  | 0.867    | -.1872571 .2222631   |
| None of mentioned options             | -.3151176   | .1234457  | 0.011*** | -.5574859 -.0727494  |

\*\*\* = significance level p < 0.05
